# Supplementary material
Source: Springer Nature journal article supplement (https://www.springermedizin.de/resource/supplementary/13054_2010_8639_MOESM4_ESM.pdf/9732436)

Lung

Liver

Gut

Kidney

sham 30'    flag 1 $\mu$ g 30'sham 30'    flag 1 $\mu$ g 30'sham 30'    flag 1 $\mu$ g 30'sham 30'    flag 1 $\mu$ g 30'

IB : pJNK

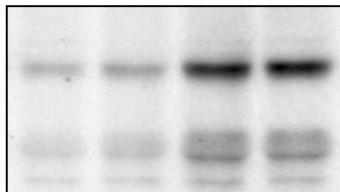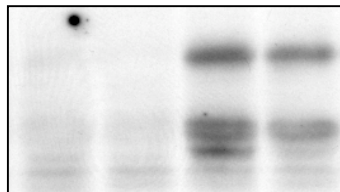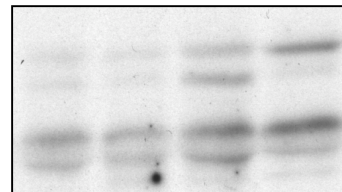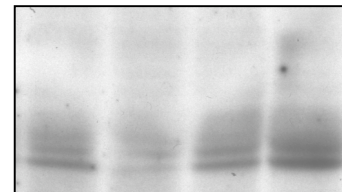

IB : JNK

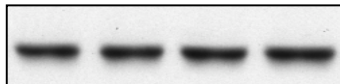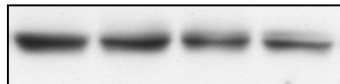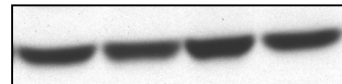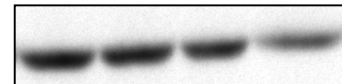

IB : pERK

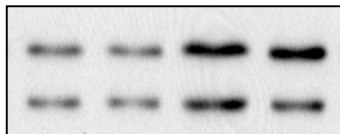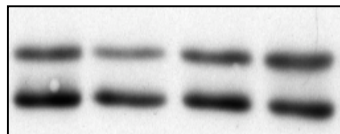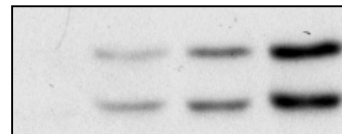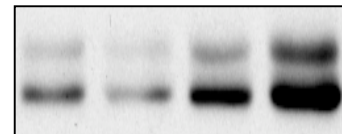

IB : ERK

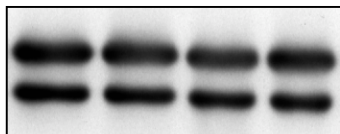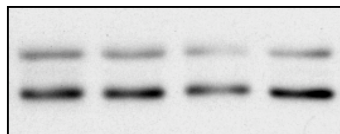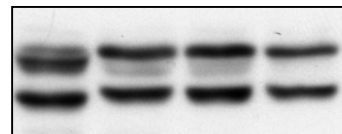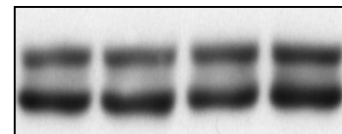IB :  $\alpha$ -tubuline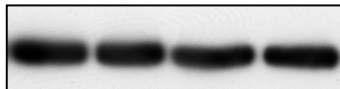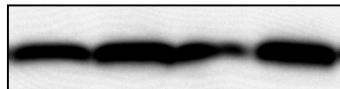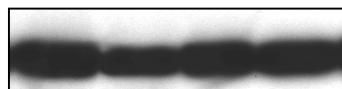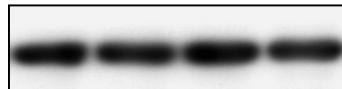

Supplement: MOESM4 [file 9732436]
